# Supplementary material for: A Mendelian randomization research on the association between eating dried fruits and being overweight
Source: Research Square preprint supplement (doi:10.21203/rs.3.rs-6220251/v1), 2025-04-01
Supplement: Supplementary file 1 [file c430ad41047650f4d11c77b3.docx]

Supplementary Material

# Supplementary Data

**Supplementary Table 1.** Date sources of exposure or outcome in the study.

| **Exposure/outcome** | **GWAS ID** | **Consortium** | **Sample size** | **PMID** | **Population** |
| --- | --- | --- | --- | --- | --- |
| Dried fruit intake | ukb-b-16576 | MRC-IEU | 421,764 | NA | European |
| Body mass index | ieu-b-40 | GIANT | 681,275 | 30124842 | European |
| Waist-to-hip ratio | ieu-a-72 | GIANT | 224,459 | 25673412 | European |
| Fresh fruit intake | ukb-b-3881 | MRC-IEU | 446,462 | NA | European |
| Cereal intake | ukb-b-15926 | MRC-IEU | 441,640 | NA | European |
| Vitamin C | ukb-b-19390 | MRC-IEU | 64,979 | NA | European |
| Year ended full time education | ukb-b-2709 | MRC-IEU | 112,569 | NA | European |

**Supplementary Table 2.** Summary statistics for the single-nucleotide polymorphisms (SNP) associated with dried fruit intake in the present Mendelian randomization study

| **Num** | **SNP** | **EAF** | **EA** | **OA** | **BETA** | **SE** | **P** | **chr** | **Position** | **N** | **R2** | **F** |
| --- | --- | --- | --- | --- | --- | --- | --- | --- | --- | --- | --- | --- |
| 1 | rs261809 | 0.54 | G | A | -0.01 | 0.0017 | 9.80009E-09 | 1 | 241054465 | 421764 | 0.00008 | 32.89 |
| 2 | rs11586016 | 0.37 | C | G | 0.01 | 0.0017 | 1.09999E-08 | 1 | 44031793 | 421764 | 0.00008 | 32.59 |
| 3 | rs12137234 | 0.30 | T | C | 0.01 | 0.0018 | 2.80001E-08 | 1 | 72270797 | 421764 | 0.00007 | 30.85 |
| 4 | rs72720396 | 0.23 | G | A | 0.01 | 0.0020 | 8.70001E-09 | 1 | 91191582 | 421764 | 0.00008 | 33.12 |
| 5 | rs11811826 | 0.22 | A | T | 0.01 | 0.0020 | 4.40048E-11 | 1 | 204603861 | 421764 | 0.00010 | 43.43 |
| 6 | rs3101339 | 0.60 | C | A | 0.01 | 0.0017 | 6.20012E-17 | 1 | 72748669 | 421764 | 0.00017 | 69.91 |
| 7 | rs75641275 | 0.14 | C | A | -0.01 | 0.0024 | 2.90001E-09 | 1 | 98327133 | 421764 | 0.00008 | 35.25 |
| 8 | rs7582086 | 0.47 | T | G | -0.01 | 0.0017 | 8.79995E-09 | 2 | 60231826 | 421764 | 0.00008 | 33.09 |
| 9 | rs7599488 | 0.43 | T | C | -0.01 | 0.0017 | 6.69993E-10 | 2 | 60718347 | 421764 | 0.00009 | 38.10 |
| 10 | rs4149513 | 0.49 | A | G | 0.01 | 0.0017 | 2.19989E-12 | 2 | 101022726 | 421764 | 0.00012 | 49.25 |
| 11 | rs17184707 | 0.21 | T | C | -0.01 | 0.0020 | 0.000000021 | 2 | 166183577 | 421764 | 0.00007 | 31.43 |
| 12 | rs4269101 | 0.72 | G | T | -0.01 | 0.0019 | 1.10002E-13 | 3 | 18763543 | 421764 | 0.00013 | 55.17 |
| 13 | rs11720884 | 0.25 | G | A | 0.01 | 0.0019 | 7.59994E-09 | 3 | 43941406 | 421764 | 0.00008 | 33.36 |
| 14 | rs57499472 | 0.40 | C | T | 0.01 | 0.0017 | 8.10009E-09 | 3 | 147239337 | 421764 | 0.00008 | 33.26 |
| 15 | rs10026792 | 0.29 | A | G | 0.01 | 0.0018 | 3.89996E-09 | 4 | 2862190 | 421764 | 0.00008 | 34.66 |
| 16 | rs1648404 | 0.48 | T | C | 0.01 | 0.0017 | 1.79999E-08 | 4 | 37175523 | 421764 | 0.00008 | 31.65 |
| 17 | rs746868 | 0.61 | G | C | -0.01 | 0.0017 | 5.19996E-14 | 6 | 31540429 | 421764 | 0.00013 | 56.66 |
| 18 | rs9385269 | 0.52 | T | C | 0.01 | 0.0017 | 7.19946E-13 | 6 | 98547979 | 421764 | 0.00012 | 51.48 |
| 19 | rs2328887 | 0.90 | C | T | 0.02 | 0.0028 | 8.80035E-12 | 6 | 25430149 | 421764 | 0.00011 | 46.59 |
| 20 | rs2533273 | 0.48 | A | C | -0.01 | 0.0017 | 3.89996E-09 | 7 | 153485282 | 421764 | 0.00008 | 34.68 |
| 21 | rs7808471 | 0.32 | C | T | -0.01 | 0.0018 | 1.09999E-10 | 7 | 132716502 | 421764 | 0.00010 | 41.72 |
| 22 | rs11772627 | 0.18 | C | G | 0.02 | 0.0022 | 2.99985E-17 | 7 | 2109821 | 421764 | 0.00017 | 71.32 |
| 23 | rs7829800 | 0.67 | G | A | -0.01 | 0.0018 | 5.1E-09 | 8 | 144258705 | 421764 | 0.00008 | 34.17 |
| 24 | rs10740991 | 0.72 | C | G | 0.02 | 0.0019 | 1.99986E-19 | 10 | 22058137 | 421764 | 0.00019 | 81.23 |
| 25 | rs7916868 | 0.50 | T | A | 0.01 | 0.0017 | 9.09997E-09 | 10 | 64988931 | 421764 | 0.00008 | 33.03 |
| 26 | rs893856 | 0.15 | A | G | -0.01 | 0.0023 | 1.29999E-08 | 10 | 126723567 | 421764 | 0.00008 | 32.35 |
| 27 | rs10896126 | 0.30 | G | A | -0.02 | 0.0018 | 1.59993E-16 | 11 | 66292908 | 421764 | 0.00016 | 68.07 |
| 28 | rs11037497 | 0.45 | C | G | 0.01 | 0.0017 | 5.69994E-10 | 11 | 43622423 | 421764 | 0.00009 | 38.41 |
| 29 | rs1622515 | 0.48 | G | A | 0.01 | 0.0017 | 2.90001E-09 | 11 | 95523433 | 421764 | 0.00008 | 35.23 |
| 30 | rs3764002 | 0.26 | T | C | 0.01 | 0.0019 | 5.10035E-12 | 12 | 108618630 | 421764 | 0.00011 | 47.65 |
| 31 | rs4140799 | 0.53 | A | G | 0.01 | 0.0017 | 1.79999E-08 | 14 | 72170969 | 421764 | 0.00008 | 31.74 |
| 32 | rs34162196 | 0.10 | T | C | -0.02 | 0.0028 | 7.10068E-16 | 14 | 22038125 | 421764 | 0.00015 | 65.10 |
| 33 | rs10129747 | 0.53 | G | A | 0.01 | 0.0017 | 2.59998E-08 | 14 | 77433198 | 421764 | 0.00007 | 30.99 |
| 34 | rs1797235 | 0.37 | C | G | -0.01 | 0.0017 | 8.9E-09 | 15 | 47821612 | 421764 | 0.00008 | 33.08 |
| 35 | rs11632215 | 0.12 | C | A | -0.01 | 0.0026 | 4.39997E-08 | 15 | 45319982 | 421764 | 0.00007 | 29.96 |
| 36 | rs862227 | 0.46 | G | A | -0.01 | 0.0017 | 4.30002E-08 | 16 | 73602926 | 421764 | 0.00007 | 30.03 |
| 37 | rs1582322 | 0.60 | G | A | 0.01 | 0.0017 | 6.80002E-09 | 16 | 52105988 | 421764 | 0.00008 | 33.59 |
| 38 | rs62084586 | 0.17 | C | T | 0.01 | 0.0023 | 3.2E-09 | 17 | 56419228 | 421764 | 0.00008 | 35.07 |
| 39 | rs8081370 | 0.91 | T | C | -0.02 | 0.0029 | 1.40001E-08 | 17 | 1373612 | 421764 | 0.00008 | 32.18 |
| 40 | rs4800488 | 0.49 | A | C | 0.01 | 0.0017 | 7.70016E-13 | 18 | 21117571 | 421764 | 0.00012 | 51.37 |
| 41 | rs17175518 | 0.23 | A | C | 0.01 | 0.0020 | 5.89997E-09 | 18 | 57850583 | 421764 | 0.00008 | 33.88 |
| 42 | rs11152349 | 0.30 | A | G | 0.01 | 0.0018 | 4.90004E-08 | 18 | 60233646 | 421764 | 0.00007 | 29.74 |
| 43 | rs429358 | 0.15 | C | T | 0.02 | 0.0023 | 6.70039E-18 | 19 | 45411941 | 421764 | 0.00018 | 74.31 |

SNP, single-nucleotide polymorphism; Chr, chromosome; EA, effect allele; EAF, effect allele frequency; SE, standard error

R2 was calculated as follows:

2*EAF*(1-EAF)*beta^2 / (2*EAF*(1-EAF)*beta^2)+(2*EAF*(1-EAF)*N*SE^2)

The F-statistic for each SNP was calculated as follows: F=(N−2)*R2/(1−R2).

**Supplementary Table 3.** SNPs violated the consumption 3 and linked to potential confounding factors.

| **SNP** | **Trait** |
| --- | --- |
| rs3101339 | Body mass index |
| rs75641275 | Body mass index |
| rs7599488 | Body mass index |
| rs4149513 | Body mass index |
| rs17184707 | Body mass index |
| rs4269101 | Body mass index |
| rs11720884 | Body mass index |
| rs10026792 | Body mass index |
| rs746868 | diabetes/Trunk predicted mass/Trunk fat-free mass |
| rs9385269 | Body mass index |
| rs2328887 | Body mass index |
| rs11772627 | Body mass index |
| rs10740991 | Body mass index |
| rs7916868 | Body mass index |
| rs11037497 | Body mass index |
| rs3764002 | Waist hip ratio |
| rs1797235 | Body mass index |
| rs862227 | Weight/Whole body fat mass/Waist circumference |
| rs4800488 | Body mass index |
| rs17175518 | Body mass index |
| rs429358 | Body mass index |

**Supplementary Table 4.** 22 SNPs as instrumental variables (IVs) associated with dried fruit intake use for MR analysis.

| Num | **SNP** | **Chr** | **Position** | **EA** | **OA** | **BETA** | **SE** | **P** | **sample size** | **EAF** | **R2** | **F** |
| --- | --- | --- | --- | --- | --- | --- | --- | --- | --- | --- | --- | --- |
| 1 | rs261809 | 1 | 241054465 | G | A | -0.010 | 0.0017 | 9.80E-09 | 421764 | 0.54 | 7.80E-05 | 32.89 |
| 2 | rs11586016 | 1 | 44031793 | C | G | 0.010 | 0.0017 | 1.10E-08 | 421764 | 0.37 | 7.73E-05 | 32.59 |
| 3 | rs12137234 | 1 | 72270797 | T | C | 0.010 | 0.0018 | 2.80E-08 | 421764 | 0.30 | 7.31E-05 | 30.85 |
| 4 | rs72720396 | 1 | 91191582 | G | A | 0.011 | 0.0020 | 8.70E-09 | 421764 | 0.23 | 7.85E-05 | 33.12 |
| 5 | rs11811826 | 1 | 204603861 | A | T | 0.013 | 0.0020 | 4.40E-11 | 421764 | 0.22 | 0.000102951 | 43.43 |
| 8 | rs7582086 | 2 | 60231826 | T | G | -0.010 | 0.0017 | 8.80E-09 | 421764 | 0.47 | 7.84E-05 | 33.09 |
| 14 | rs57499472 | 3 | 147239337 | C | T | 0.010 | 0.0017 | 8.10E-09 | 421764 | 0.40 | 7.89E-05 | 33.26 |
| 16 | rs1648404 | 4 | 37175523 | T | C | 0.009 | 0.0017 | 1.80E-08 | 421764 | 0.48 | 7.50E-05 | 31.65 |
| 20 | rs2533273 | 7 | 153485282 | A | C | -0.010 | 0.0017 | 3.90E-09 | 421764 | 0.48 | 8.22E-05 | 34.68 |
| 21 | rs7808471 | 7 | 132716502 | C | T | -0.012 | 0.0018 | 1.10E-10 | 421764 | 0.32 | 9.89E-05 | 41.72 |
| 23 | rs7829800 | 8 | 144258705 | G | A | -0.010 | 0.0018 | 5.10E-09 | 421764 | 0.67 | 8.10E-05 | 34.17 |
| 26 | rs893856 | 10 | 126723567 | A | G | -0.013 | 0.0023 | 1.30E-08 | 421764 | 0.15 | 7.67E-05 | 32.35 |
| 27 | rs10896126 | 11 | 66292908 | G | A | -0.015 | 0.0018 | 1.60E-16 | 421764 | 0.30 | 0.000161364 | 68.07 |
| 29 | rs1622515 | 11 | 95523433 | G | A | 0.010 | 0.0017 | 2.90E-09 | 421764 | 0.48 | 8.35E-05 | 35.23 |
| 31 | rs4140799 | 14 | 72170969 | A | G | 0.009 | 0.0017 | 1.80E-08 | 421764 | 0.53 | 7.53E-05 | 31.74 |
| 32 | rs34162196 | 14 | 22038125 | T | C | -0.022 | 0.0028 | 7.10E-16 | 421764 | 0.10 | 0.000154323 | 65.10 |
| 33 | rs10129747 | 14 | 77433198 | G | A | 0.009 | 0.0017 | 2.60E-08 | 421764 | 0.53 | 7.35E-05 | 30.99 |
| 35 | rs11632215 | 15 | 45319982 | C | A | -0.014 | 0.0026 | 4.40E-08 | 421764 | 0.12 | 7.10E-05 | 29.96 |
| 37 | rs1582322 | 16 | 52105988 | G | A | 0.010 | 0.0017 | 6.80E-09 | 421764 | 0.60 | 7.96E-05 | 33.59 |
| 38 | rs62084586 | 17 | 56419228 | C | T | 0.013 | 0.0023 | 3.20E-09 | 421764 | 0.17 | 8.32E-05 | 35.07 |
| 39 | rs8081370 | 17 | 1373612 | T | C | -0.017 | 0.0029 | 1.40E-08 | 421764 | 0.91 | 7.63E-05 | 32.18 |
| 42 | rs11152349 | 18 | 60233646 | A | G | 0.010 | 0.0018 | 4.90E-08 | 421764 | 0.30 | 7.05E-05 | 29.74 |

# Supplementary Figures and Tables

## Supplementary **Figure**


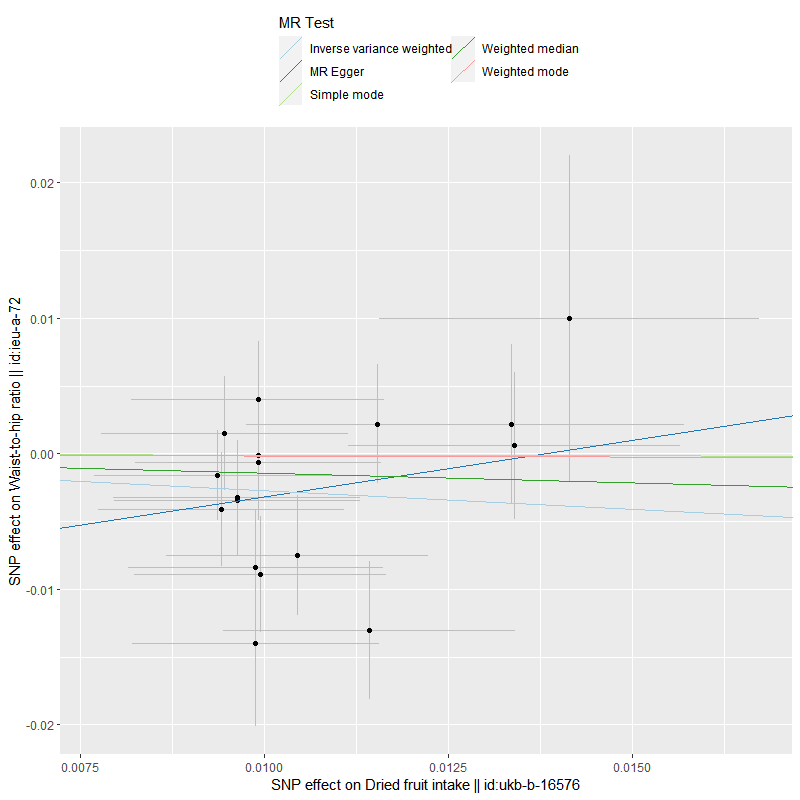

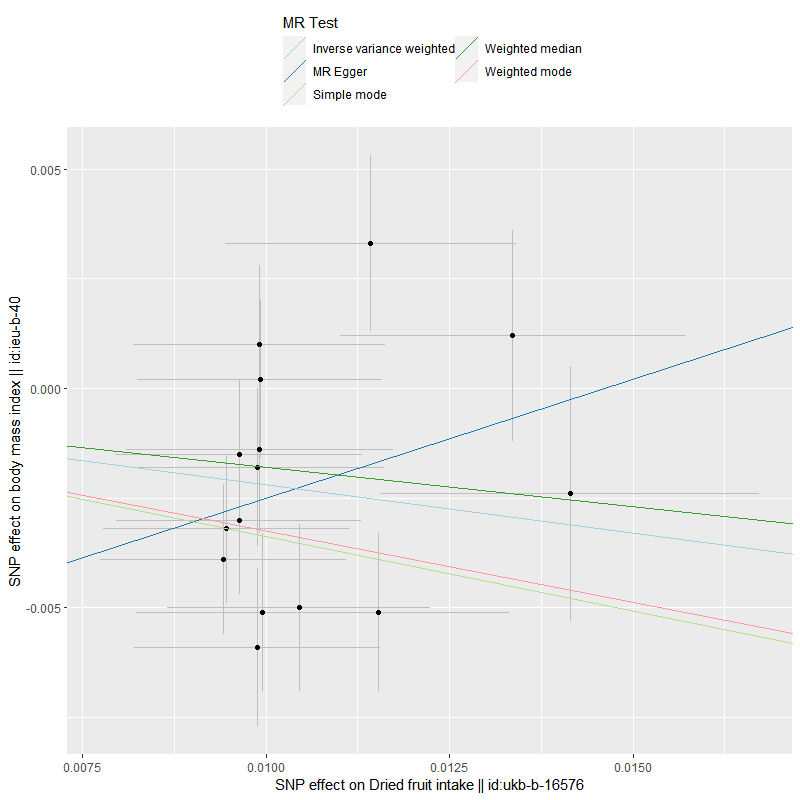

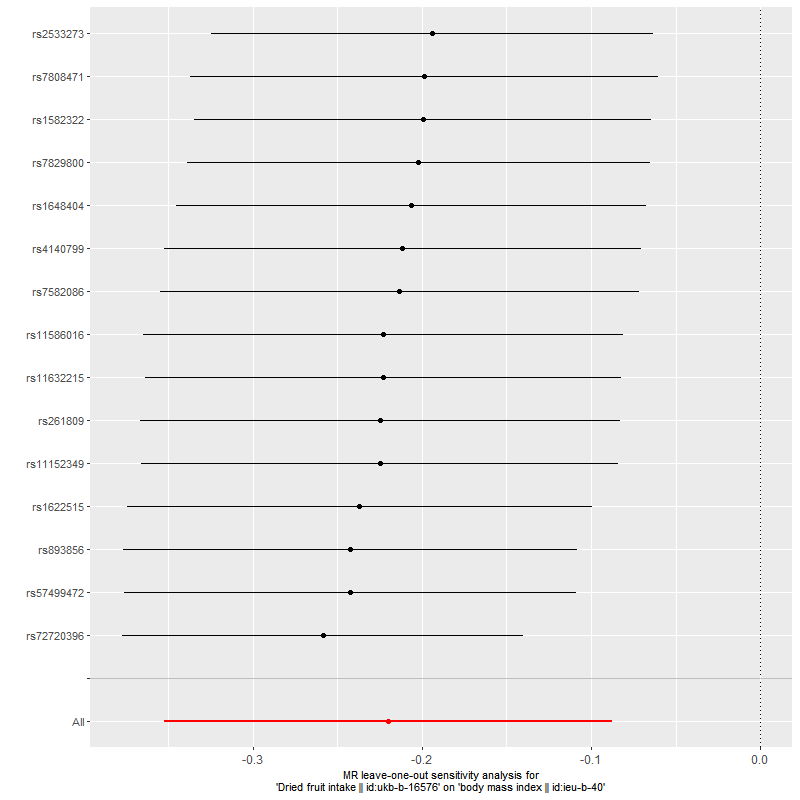

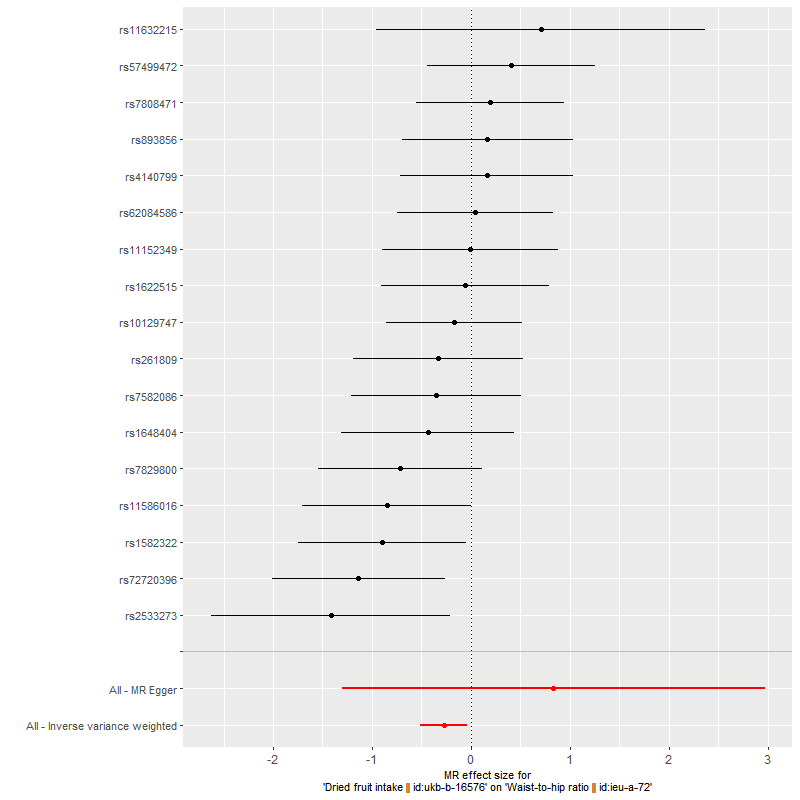


The figure legends are required to have the same font as the main text, 12 point normal Times New Roman, single spaced. Please use a single paragraph for each legend and prepare the figures keeping in mind the PDF layout.
